# Supplementary material for: Hierarchical architecture for flexible energy storage
Source: Royal Society of Chemistry journal article supplement (doi:10.1039/c7nr00867h), 2017-01-01
Supplement: c7nr00867h1.pdf [file c7nr00867h1.pdf]

## SUPPORTING INFORMATION

### *Hierarchical Chiral Architecture for Flexible Energy Storage*

by H. Pan and S. Zhu *et al.*

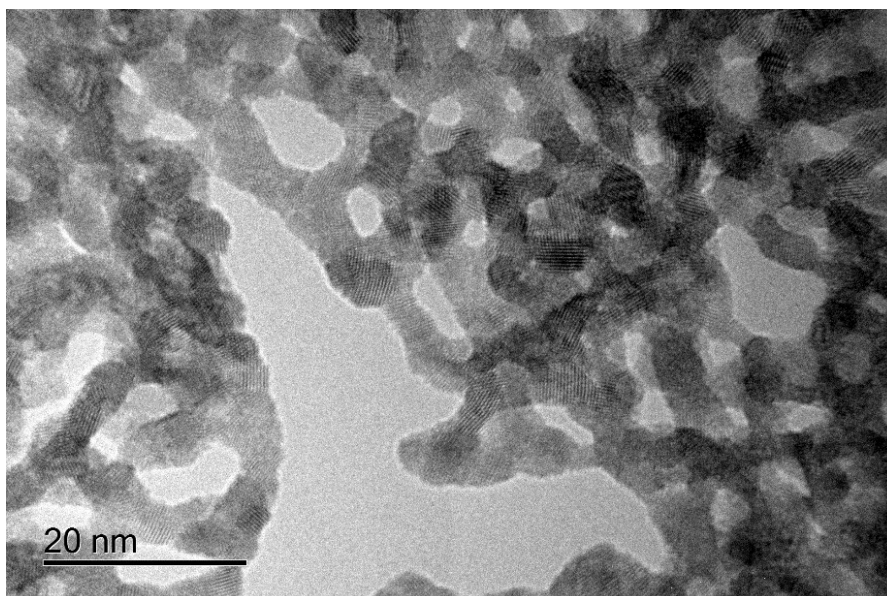

**Fig. S1** TEM of SnO<sub>2</sub> quantum dots.

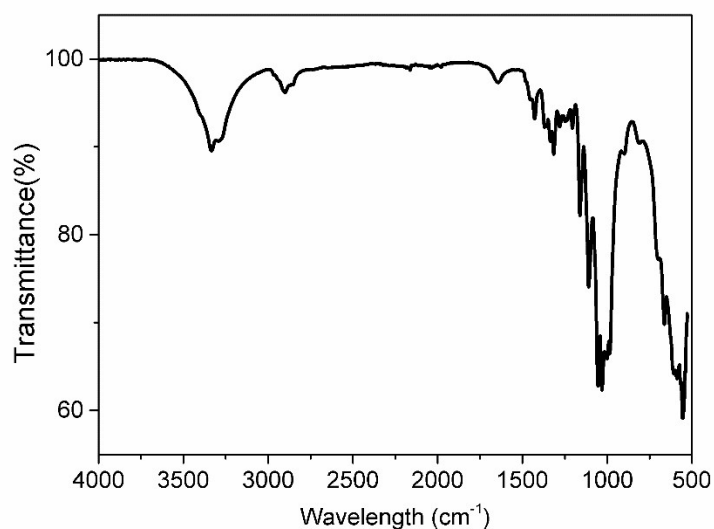

**Figure S2.** FTIR spectrum of CNC.

Figure S2 shows the FTIR spectrum of CNC. The broad band at around 3000-3700 cm<sup>-1</sup> can be assigned to the O-H stretching vibration. The peaks at 3334 cm<sup>-1</sup> and 3269 cm<sup>-1</sup> can be attributed to OH group of free water or the pyranose rings of CNC. In terms of CNC, the

peaks at around  $1050\text{ cm}^{-1}$  are corresponding to the C-O stretching vibrations (alkoxy groups). The absorbance peak at  $1004\text{ cm}^{-1}$  is ascribed to the C-O stretching in CNC introduced during the sulfuric acid hydrolysis.

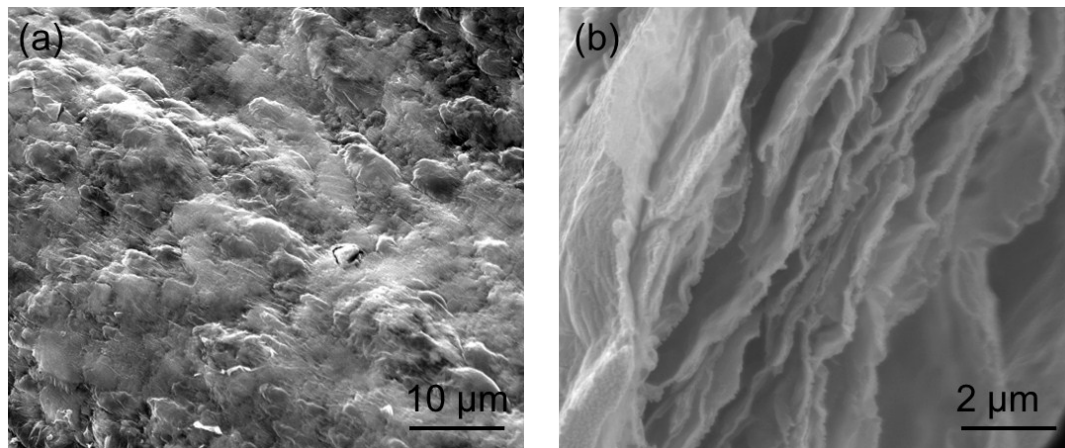

**Fig. S3** SEM of  $\text{SnO}_2/\text{rGO}$  film. (a) Surface and (b) Cross-section.

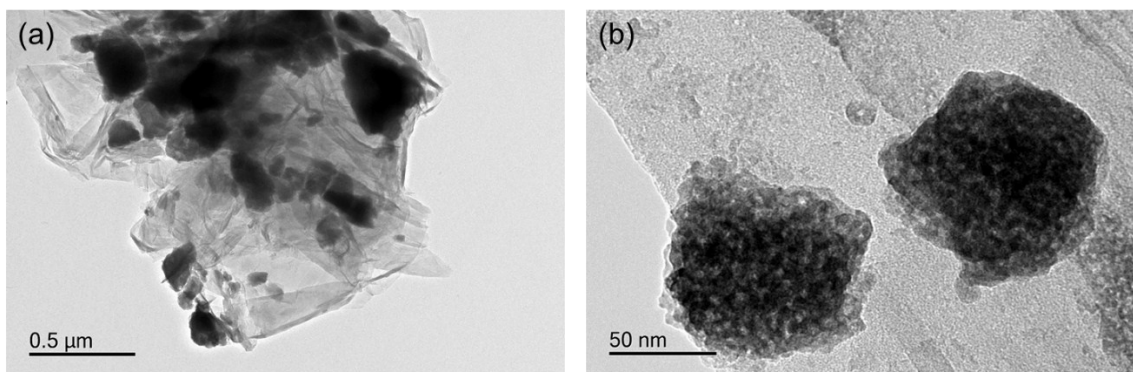

**Fig. S4** TEM of  $\text{SnO}_2/\text{rGO}$  film at different magnification.
